# Supplementary material for: Voltammetric determination of diazepam using a bismuth modified pencil graphite electrode
Source: Royal Society of Chemistry journal article supplement (doi:10.1039/c6ay00098c), 2016-01-01
Supplement: c6ay00098c1.pdf [file c6ay00098c1.pdf]

**Supplementary Data for**  
**“Voltammetric determination of Diazepam using bismuth modified**  
**pencil graphite electrode”**

Mahsa Dehghanzade <sup>a</sup> and Esmaeel Alipour<sup>\*, a</sup>

<sup>a</sup> Electroanalytical Chemistry Laboratory, Department of Analytical Chemistry, Faculty of Chemistry, University of Tabriz, Tabriz, Iran

\*Corresponding author

E-mail: [i-alipour@tabrizu.ac.ir](mailto:i-alipour@tabrizu.ac.ir), Fax: +98 413 3340191

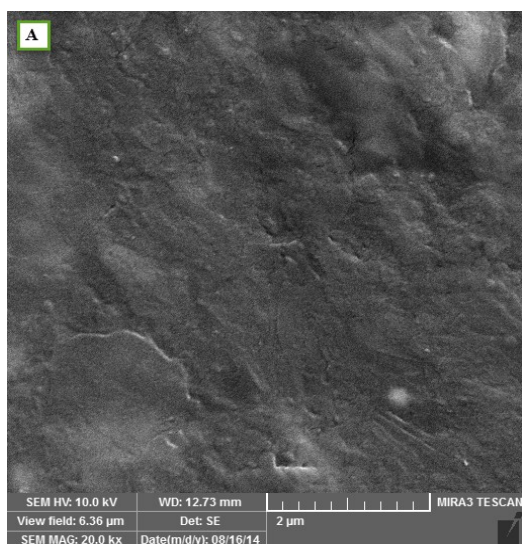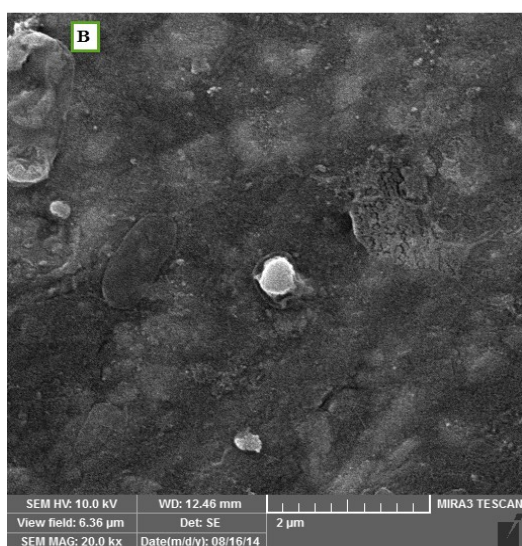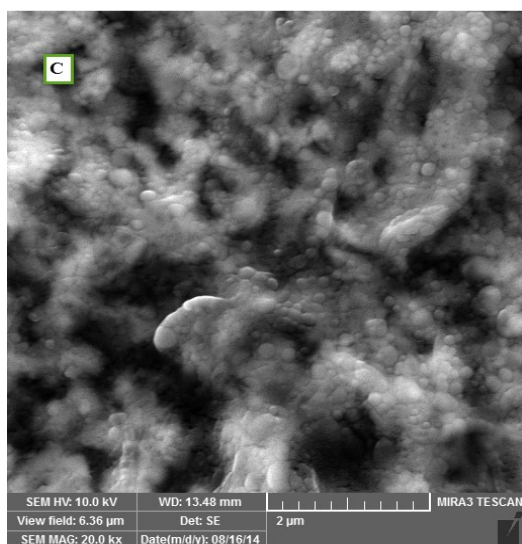

**Figure S1**

**Fig. S1** SEM images of (A) bare PGE, (B) PPGE and (C) BiPPGE surface.

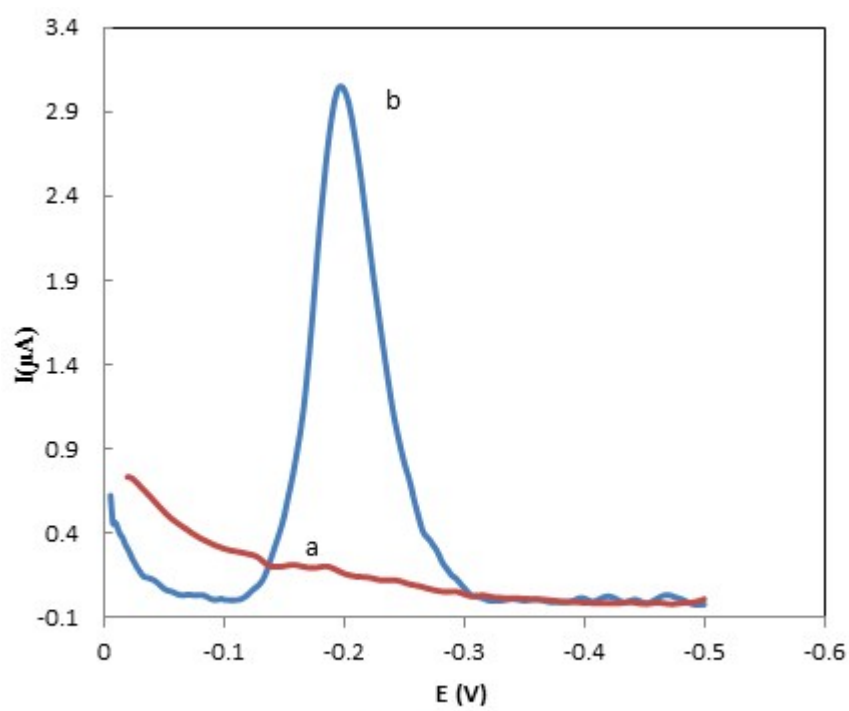

**Figure S2**

**Fig. S2** Differential pulse voltammogram of (a) PPGE, (b) BiPPGE 0.5 M in acetate buffer pH= 4.8.

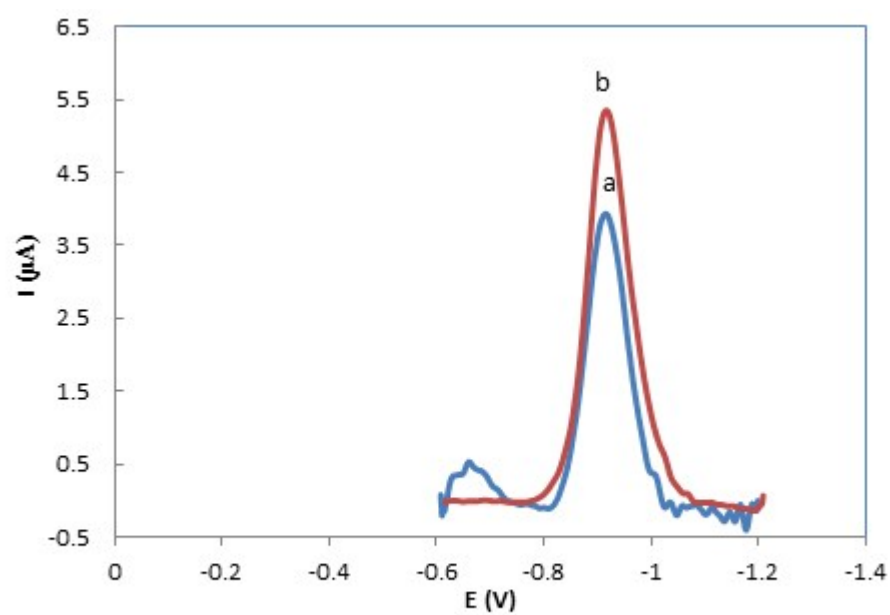

**Figure S3**

**Fig. S3** Differential pulse voltammogram of BiPPGE pretreated with (a) potentiodynamic and (b) potentiostatic method in 0.5 M acetate buffer solution pH= 4.8 containing 0.04 mM DZ.

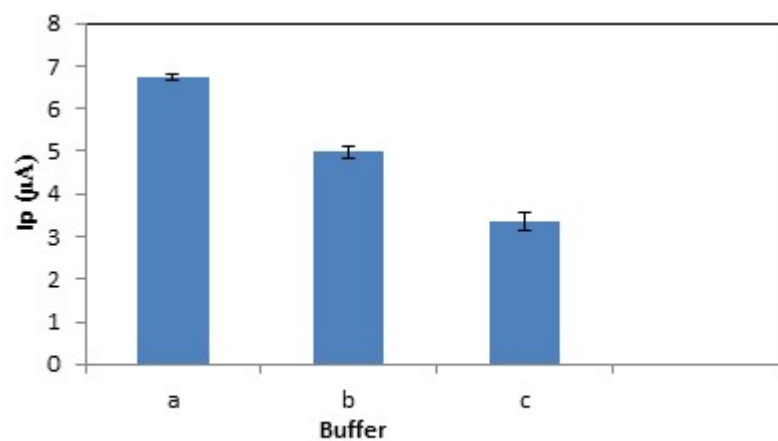

**Figure S4**

**Fig. S4** Differential pulse voltammograms of 0.04 mM DZ in (a) 0.5 M acetate buffer pH= 4.8, (b) phosphate buffer 0.5 M pH=5, (c) Britton-Robinson buffer 0.12 M pH=5.

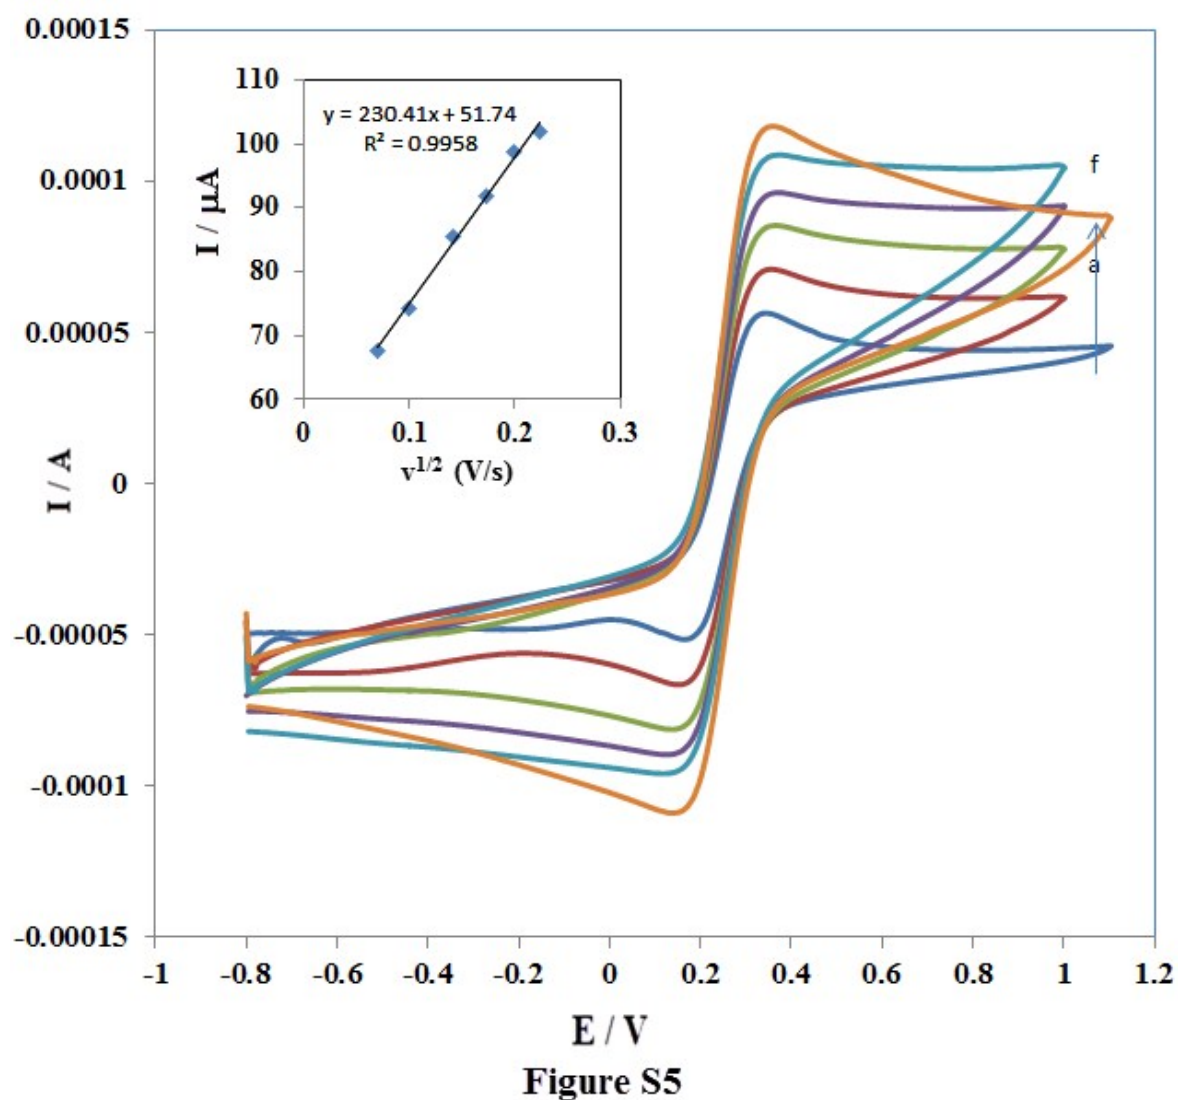

**Fig. S5** Cyclic voltammograms obtained at PPGE in the presence of 0.005 M potassium hexacyanoferrate at (a) 5, (b) 10, (c) 20, (d) 30, (e) 40, (f) 50  $\text{mV}\cdot\text{s}^{-1}$  scan rates. Inset:  $I_p$  versus  $V^{1/2}$  graph related to fig. S5.
